# Supplementary material for: Essential thrombocytosis transformed AML with TP53 mutations and its clinical implications
Source: PubMed Central journal article supplement — Discov Oncol. 2024 Dec 18;15:786. doi: 10.1007/s12672-024-01665-y (PMC11655794; doi:10.1007/s12672-024-01665-y), 2024-12-18
Supplement: 12672_2024_1665_MOESM1_ESM.pdf [file 12672_2024_1665_MOESM1_ESM.pdf]

Table 1: Laboratory tests at the time of primary di

|      | WBC ( $\times 10^9 / L$ ) | Hb (g/L) | PLT ( $\times 10^9 / L$ ) | ALT (U/L) | AST (U/L) |    |
|------|---------------------------|----------|---------------------------|-----------|-----------|----|
| Pt 1 | 9.96                      |          | 142                       | 926       | 28        | 31 |
| Pt 2 | 8                         |          | 148                       | 1015      | 51        | 60 |
| Pt 3 | 10.1                      |          | 150                       | 1031      | 9         | 19 |

Comparison of blood routine test and biochemical criterion between three patients at the time of diagnosis  
 PLT: platelets; ALT: Alanine transaminase; AST: aspartate aminotransferase; Cr: creatinine; BG: bl

Diagnosis of ET

| Cr (umol/L) | BG (mmol/L) | UA (umol/L) | BNP (pg/ml) |
|-------------|-------------|-------------|-------------|
| 72          | 8           | 460         | 51          |
| 80          | 6           | 477         | 76          |
| 51          | 5.2         | 450         | 87          |

Diagnosis of AML. WBC: white blood cell; Hb:hemoglobin;  
Blood glucose; UA: uric acid; BNP:B-type natriuretic peptide.
