# Supplementary material for: Essential thrombocytosis transformed AML with TP53 mutations and its clinical implications
Source: PubMed Central journal article supplement — Discov Oncol. 2024 Dec 18;15:786. doi: 10.1007/s12672-024-01665-y (PMC11655794; doi:10.1007/s12672-024-01665-y), 2024-12-18
Supplement: 12672_2024_1665_MOESM2_ESM.pdf [file 12672_2024_1665_MOESM2_ESM.pdf]

Table 2: Laboratory tests and risk category

Comparison of imaging, morphology and risk category between the

|      | Chest X-ray | Blasts in Bone Marrow |
|------|-------------|-----------------------|
| Pt 1 | /           | 83%                   |
| Pt 2 | pneumonia   | 91%                   |
| Pt 3 | /           | 35%                   |

at the time of diagnosis of AML

three patients at the time of diagnosis of AML

Risk Category

poor

poor

intermediate
