# Supplementary material for: Essential thrombocytosis transformed AML with TP53 mutations and its clinical implications
Source: PubMed Central journal article supplement — Discov Oncol. 2024 Dec 18;15:786. doi: 10.1007/s12672-024-01665-y (PMC11655794; doi:10.1007/s12672-024-01665-y), 2024-12-18
Supplement: 12672_2024_1665_MOESM3_ESM.pdf [file 12672_2024_1665_MOESM3_ESM.pdf]

Table 3: Genetic tests at the time of diagnosis of E

|      | TP53 Gene mutations when ET diagnosed | Karyotype when ET diagnosed | Other key mutations when ET diagnosed | TP53 Gene mutations when AML diagnosed                |
|------|---------------------------------------|-----------------------------|---------------------------------------|-------------------------------------------------------|
| Pt 1 | Nil                                   | Normal                      | CALR p.L637fs                         | TP53 p.V172A (VAF.51.3%)                              |
| Pt 2 | Nil                                   | Normal                      | Nil                                   | TP53 p.Y220C (VAF.43.3%);<br>TP53 p.H179R (VAF.48.5%) |
| Pt 3 | Nil                                   | Normal                      | JAK2 p.V617F                          | Nil                                                   |

Comparison of gene mutation and karyotype between the three patients at tl

T and AML

| Karyotype when AML diagnosed                        | Other key mutations when AML diagnosed        |
|-----------------------------------------------------|-----------------------------------------------|
| Normal                                              | CALR p.L637fs<br>(VAF.18.4%)                  |
| 45,XY,-<br>3,del(4)(q21),add(5)(q13),-<br>7,+mar[4] | Nil                                           |
| Normal                                              | JAK2 p.V617F<br>(VAF.3.4%) IDH2<br>(VAF.2.3%) |

at the time of diagnosis of ET and AML.
